# Supplementary material for: How tight are beetle hugs? Attachment in mating leaf beetles
Source: PubMed Central journal article supplement (PMC5627132; doi:10.1098/rsos.171108), 2017-09-13
Supplement: rsos171108supp1.pdf [file rsos171108supp1.pdf]

## Supplementary Information

**Table S1.** Surface free energy, its dispersive and polar components ( $n = 3$ ) as well as contact angles of 1- $\mu\text{l}$  large droplets of three fluids ( $n = 9$  per fluid) obtained on elytra of three female beetles *Chrysolina americana* and on three glass slides, which were used as test substrates in the pull-off experiments (mean  $\pm$  sd)

|                                             | elytra          | glass          |
|---------------------------------------------|-----------------|----------------|
| FSE [ $\text{mN m}^{-1}$ ]                  | $18.5 \pm 1.8$  | $55.7 \pm 0.5$ |
| dispersive component [ $\text{mN m}^{-1}$ ] | $14.8 \pm 1.5$  | $18.8 \pm 1.6$ |
| polar component [ $\text{mN m}^{-1}$ ]      | $3.7 \pm 2.8$   | $36.9 \pm 2.0$ |
| static contact angle                        |                 |                |
| Aqua Millipore water [ $^{\circ}$ ]         | $95.8 \pm 10.0$ | $32.1 \pm 2.4$ |
| diiodomethane [ $^{\circ}$ ]                | $86.9 \pm 4.1$  | $44.2 \pm 4.8$ |
| ethylene glycol [ $^{\circ}$ ]              | $75.7 \pm 3.4$  | $30.2 \pm 6.6$ |

See Bräuer et al. 2017 *APIS* **11**, 171–192 (doi:10.1007/s11829-016-9478-0) for the detailed measurement procedure.

**Table S2.** Number of tarsal adhesive setae having different terminal shape, exemplarily for a male and a female leaf beetle *Chrysolina americana* ( $n = 1$  foreleg)

|             | discoid | tapered/lanceolate | spatulae | total |
|-------------|---------|--------------------|----------|-------|
| male        |         |                    |          | 1236  |
| tarsomere 1 | 206     | 208                |          |       |
| tarsomere 2 |         | 174                |          |       |
| tarsomere 3 | 98      | 36                 | 514      |       |
| female      |         |                    |          | 1787  |
| tarsomere 1 |         | 632                |          |       |
| tarsomere 2 |         | 177                |          |       |
| tarsomere 3 |         | 12                 | 966      |       |

**Table S3.** Leg length in male and female leaf beetles *Chrysolina americana*

| length [ $\mu\text{m}$ ] | male                                 | female                               |
|--------------------------|--------------------------------------|--------------------------------------|
| <b>fore leg total</b>    | <b>6179.4 <math>\pm</math> 351.0</b> | <b>5799.2 <math>\pm</math> 325.0</b> |
| fore leg trochanter      | 738.9 $\pm$ 195.6                    | 805.6 $\pm$ 66.0                     |
| fore leg femur           | 1850.6 $\pm$ 203.0                   | 1751.3 $\pm$ 115.8                   |
| fore leg tibia           | 1749.8 $\pm$ 102.0                   | 1602.8 $\pm$ 112.8                   |
| fore leg tarsus          | 1840.1 $\pm$ 119.8                   | 1639.5 $\pm$ 121.8                   |
| tarsomere 1              | 465.3 $\pm$ 70.0                     | 397.9 $\pm$ 46.3                     |
| tarsomere 2              | 316.4 $\pm$ 41.8                     | 285.9 $\pm$ 34.2                     |
| tarsomere 3              | 323.6 $\pm$ 52.0                     | 309.2 $\pm$ 23.9                     |
| tarsomere 5              | 734.8 $\pm$ 65.8                     | 646.5 $\pm$ 89.8                     |
| <b>mid leg total</b>     | <b>5286.8 <math>\pm</math> 191.2</b> | <b>6232.3 <math>\pm</math> 249.2</b> |
| mid leg trochanter       | 646.1 $\pm$ 96.2                     | 847.2 $\pm$ 125.9                    |
| mid leg femur            | 1589.7 $\pm$ 109.3                   | 1861.7 $\pm$ 119.7                   |
| mid leg tibia            | 1447.1 $\pm$ 87.1                    | 1707.2 $\pm$ 86.9                    |
| mid leg tarsus           | 1604.0 $\pm$ 103.7                   | 1816.2 $\pm$ 148.2                   |
| tarsomere 1              | 401.6 $\pm$ 52.7                     | 484.5 $\pm$ 52.9                     |
| tarsomere 2              | 305.0 $\pm$ 36.5                     | 324.8 $\pm$ 24.7                     |
| tarsomere 3              | 290.5 $\pm$ 43.1                     | 308.9 $\pm$ 37.0                     |
| tarsomere 5              | 606.8 $\pm$ 65.6                     | 698.1 $\pm$ 105.2                    |
| <b>hind leg total</b>    | <b>6081.1 <math>\pm</math> 286.7</b> | <b>7022.7 <math>\pm</math> 369.5</b> |
| hind leg trochanter      | 941.1 $\pm$ 51.9                     | 1206.2 $\pm$ 280.6                   |
| hind leg femur           | 1734.4 $\pm$ 129.7                   | 2023.8 $\pm$ 135.3                   |
| hind leg tibia           | 1737.8 $\pm$ 95.2                    | 1934.5 $\pm$ 168.8                   |
| hind leg tarsus          | 1667.7 $\pm$ 149.3                   | 1858.3 $\pm$ 146.4                   |
| tarsomere 1              | 442.2 $\pm$ 44.5                     | 468.2 $\pm$ 39.7                     |
| tarsomere 2              | 276.6 $\pm$ 29.6                     | 313.4 $\pm$ 47.5                     |
| tarsomere 3              | 300.0 $\pm$ 31.7                     | 355.2 $\pm$ 48.8                     |
| tarsomere 5              | 648.9 $\pm$ 100.1                    | 721.4 $\pm$ 86.5                     |

mean  $\pm$  sd, N<sub>♂♂</sub> = 3 pooled together, N<sub>♀♀</sub> = 3 pooled together, n = 10 per parameter

**Table S4.** Dimensions of claws of leaf beetles *Chrysolina americana*. Fore, mid, and hind leg, as well as N = 3 ♂♂ and 3 ♀♀ pooled together

|                                           | mean  | sd   | n  |
|-------------------------------------------|-------|------|----|
| claw tip diameter [ $\mu\text{m}$ ]       | 10.3  | 2.3  | 10 |
| claw curvature diameter [ $\mu\text{m}$ ] | 121.6 | 35.2 | 5  |
| claw length [ $\mu\text{m}$ ]             | 226.8 | 8.2  | 5  |

sd, standard deviation; n = sample size

**Table S5.** Dimensions of tarsal adhesive setae having different terminal shape in male and female leaf beetles *Chrysolina americana*. Fore, mid, and hind leg, as well as N = 5 ♂♂ and 5 ♀♀ pooled together; except for discoid: N = 5 ♂♂

|                                                                         | mean | sd  | n  |
|-------------------------------------------------------------------------|------|-----|----|
| spatulate seta's terminal width [ $\mu\text{m}$ ]                       | 8.7  | 0.5 | 20 |
| spatulate seta's length [ $\mu\text{m}$ ]                               | 90.0 | 9.8 | 20 |
| angle of spatulate seta on tarsomer 3                                   | 33.7 | 8.4 | 10 |
| lanceolate seta's terminal width [ $\mu\text{m}$ ]                      | 3.3  | 0.3 | 20 |
| lanceolate seta's length [ $\mu\text{m}$ ]                              | 98.0 | 8.8 | 20 |
| discoid seta's terminal width [ $\mu\text{m}$ ]                         | 8.9  | 0.6 | 20 |
| discoid seta's length [ $\mu\text{m}$ ]                                 | 90.0 | 9.8 | 20 |
| shaft base width of all seta types [ $\mu\text{m}$ ]                    | 3.8  | 0.7 | 20 |
| shaft width of the tapered part close to the terminal [ $\mu\text{m}$ ] | 1.6  | 0.6 | 5  |
| spatules' length [ $\mu\text{m}$ ]                                      | 1.7  | 0.2 | 20 |

sd, standard deviation; n = sample size

**Table S6.** Pull-off forces [mN] measured in five males (n = 15 per individual) and five females (n = 5 per individual) on female elytra and a glass plate, mean  $\pm$  sd

| ♂♂ | female elytra   | glass plate   | ♀♀ | female elytra  | glass plate   |
|----|-----------------|---------------|----|----------------|---------------|
| 1  | 30.1 $\pm$ 10.0 | 9.3 $\pm$ 4.3 | 1  | 16.7 $\pm$ 5.0 | 0.7 $\pm$ 0.3 |
| 2  | 25.0 $\pm$ 10.8 | 6.5 $\pm$ 2.8 | 2  | 15.7 $\pm$ 5.3 | 1.0 $\pm$ 0.3 |
| 3  | 33.6 $\pm$ 5.0  | 5.4 $\pm$ 1.6 | 3  | 21.1 $\pm$ 6.0 | 0.8 $\pm$ 0.3 |
| 4  | 14.9 $\pm$ 12.5 | 8.6 $\pm$ 1.6 | 4  | 22.3 $\pm$ 2.7 | 2.3 $\pm$ 0.5 |
| 5  | 31.2 $\pm$ 6.1  | 7.5 $\pm$ 2.4 | 5  | 13.8 $\pm$ 6.5 | 1.0 $\pm$ 0.4 |

**Table S7.** Safety factors measured in five males (n = 15 per individual) and five females (n = 5 per individual) on female elytra and a glass plate, mean ± sd

| ♂♂ | female elytra | glass plate | ♀♀ | female elytra | glass plate |
|----|---------------|-------------|----|---------------|-------------|
| 1  | 44.4 ± 14.6   | 12.1 ± 5.6  | 1  | 22.3 ± 6.7    | 0.9 ± 0.3   |
| 2  | 37.4 ± 16.2   | 9.7 ± 4.2   | 2  | 20.3 ± 6.7    | 1.3 ± 0.4   |
| 3  | 65.8 ± 9.8    | 10.6 ± 3.1  | 3  | 28.9 ± 8.2    | 1.1 ± 0.5   |
| 4  | 24.8 ± 20.8   | 14.3 ± 2.7  | 4  | 29.4 ± 3.5    | 3.0 ± 0.6   |
| 5  | 52.9 ± 10.3   | 12.7 ± 4.1  | 5  | 18.1 ± 8.5    | 0.5 ± 0.5   |

**Table S8.** Pull-off forces [mN] and safety factors pooled for five males (n = 15 per individual) and five females (n = 5 per individual) on female elytra and a glass plate, mean ± sd

| substrate | male           |               | female         |               |
|-----------|----------------|---------------|----------------|---------------|
|           | pull-off force | safety factor | pull-off force | safety factor |
| elytra    | 27.0 ± 11.3    | 45.0 ± 20.1   | 22.4 ± 9.1     | 29.7 ± 12.2   |
| glass     | 7.5 ± 3.0      | 11.9 ± 4.3    | 1.1 ± 0.7      | 1.5 ± 0.9     |

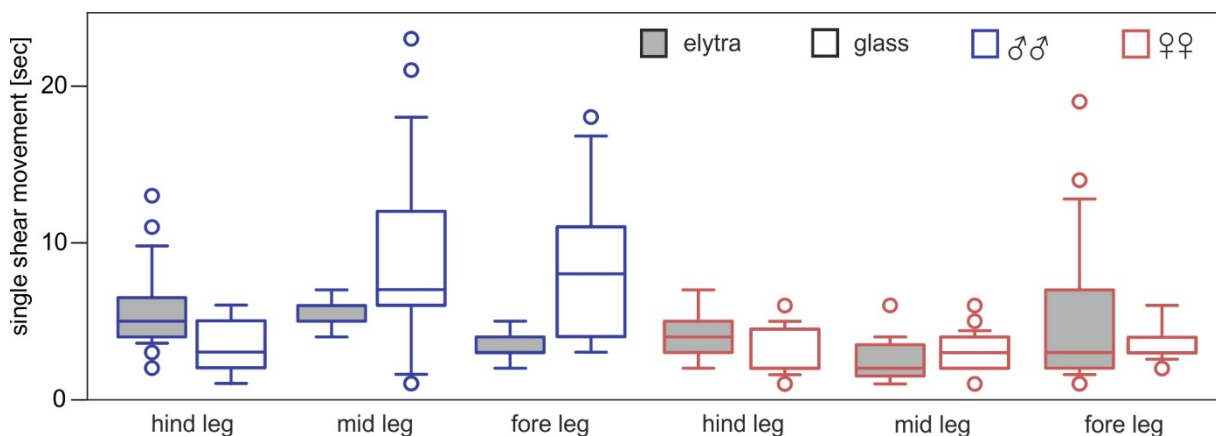

**Figure S9.** Box plots, representing the duration of shear movements in single legs of males and females (n = 25 counts per leg, surface and sex; 5 individuals per sex pooled together). The ends of the boxes define the 25th and 75th percentiles, with a line at the median and error bars defining the 10th and 90th percentiles; circles are outliers

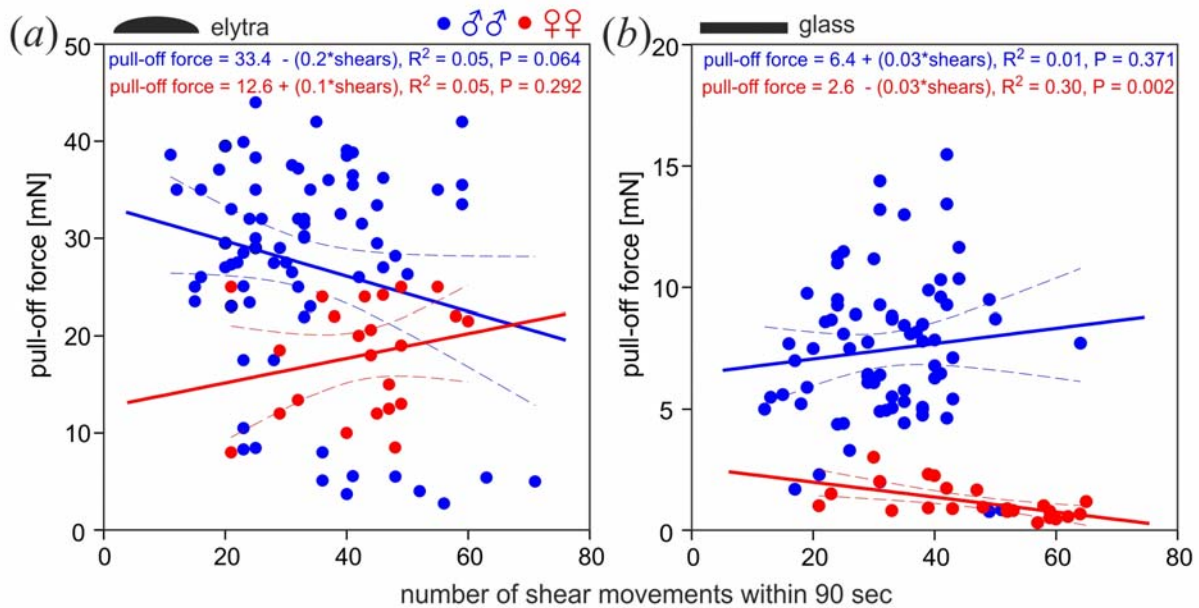

**Figure S10.** Pull-off force vs number of shear movements within 90 sec on elytra (a) and glass (b) ( $N_{\text{♂♂}} = 5$ ,  $n_{\text{♂♂}} = 15$ ,  $N_{\text{♀♀}} = 5$ ,  $n_{\text{♀♀}} = 5$ ). The line indicates linear regressions; dashed lines specify the confidence bands at 95% default confidence level; dots are data points, blue: male, red: female

**Movie S11.** A male set in contact with female elytra, shearing its legs for about 90 s before pull-off test. It can be clearly seen that mid legs are pulled/sheared rather perpendicularly to the body axis, while hind legs pull and push in almost any direction. The chain of hind tarsomeres is curved at times.

**Movie S12.** A male set in contact with female elytra, shearing its legs for about 90 s before pull-off test. The movements of the right hind leg are shown in detail.

**Movie S13.** A male set in contact with female elytra, not shearing its legs for about 90 s before pull-off test.

**Movie S14.** A female set in contact with flat glass, shearing its legs for about 90 s before pull-off test. The movements of the self-aligning sample holder becomes apparent.

**Movie S15.** A female set in contact with female elytra, distinctly shearing its legs for about 90 s before pull-off test.
